# Supplementary material for: Antifungal and Anti-Biofilm Activities of Acetone Lichen Extracts against Candida albicans
Source: PubMed Central journal article supplement (PMC6154547; doi:10.3390/molecules22040651), 2017-04-19
Supplement: molecules-22-00651-s001.pdf [file molecules-22-00651-s001.pdf]

**Figure S1:** HPLC chromatograms at 270 nm of extracts displaying an anti-biofilm activity.

*A- Cladonia ramulosa* acetone extract

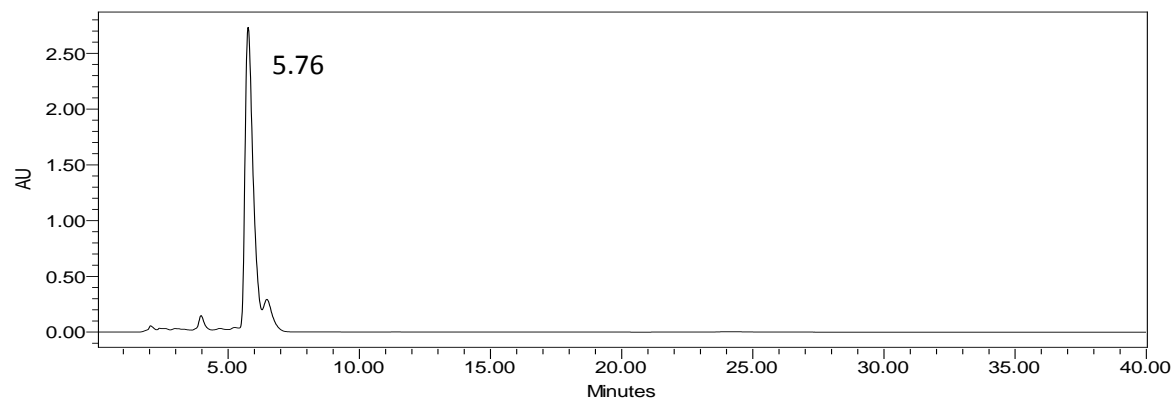

*B- Cladonia uncialis* acetone extract

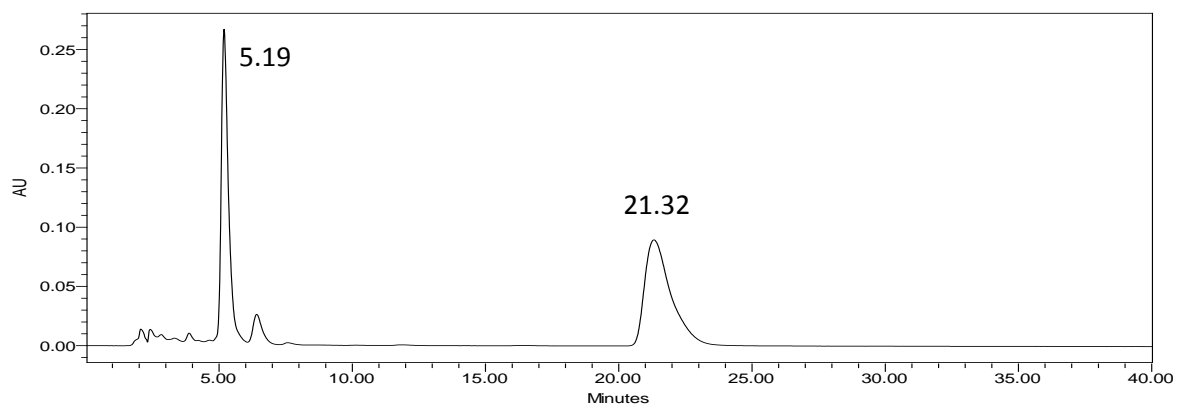

*C- Evernia prunastri* acetone extract

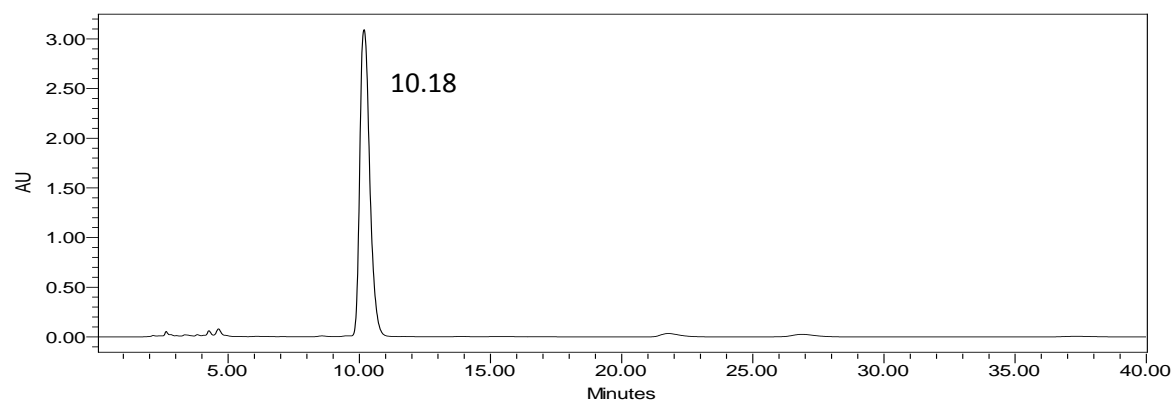

*D- Xanthoparmelia conspersa* acetone extract

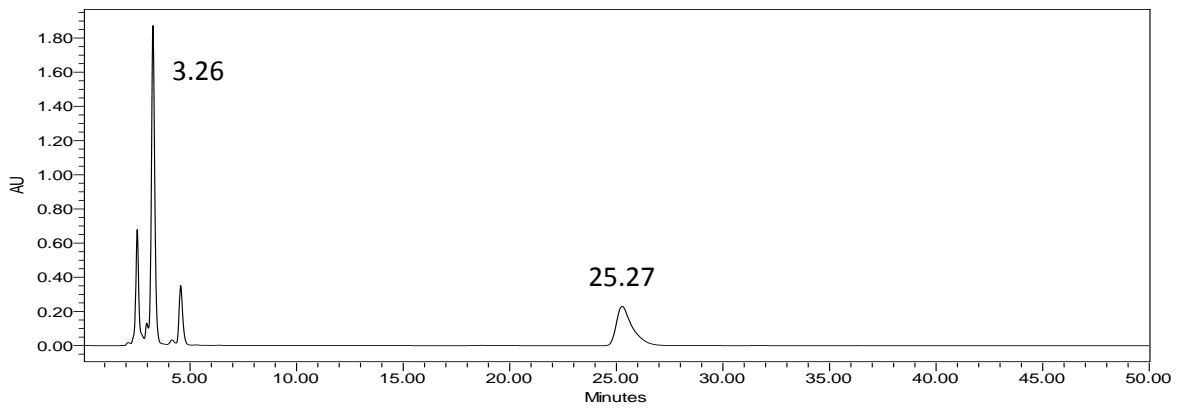

*E- Xanthoparmelia tinctoria* acetone extract

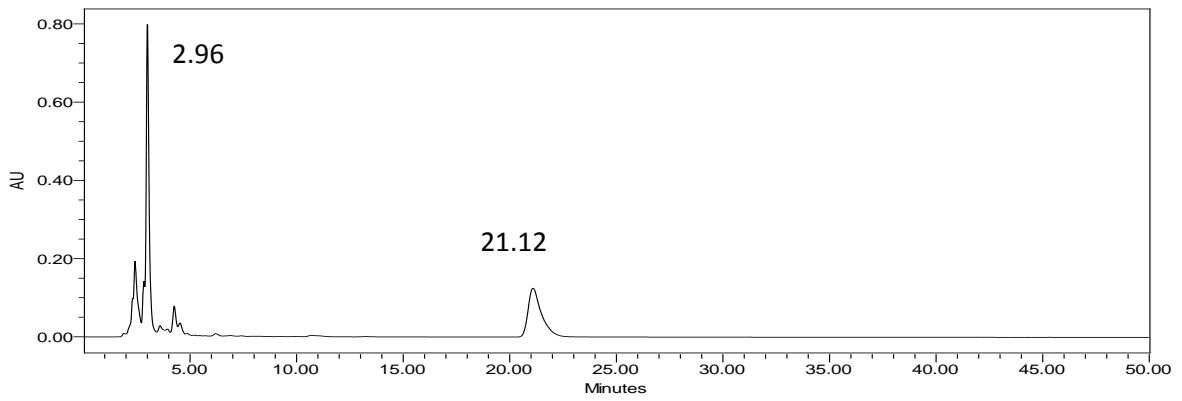

*F- Peltigera hymenina* acetone extract

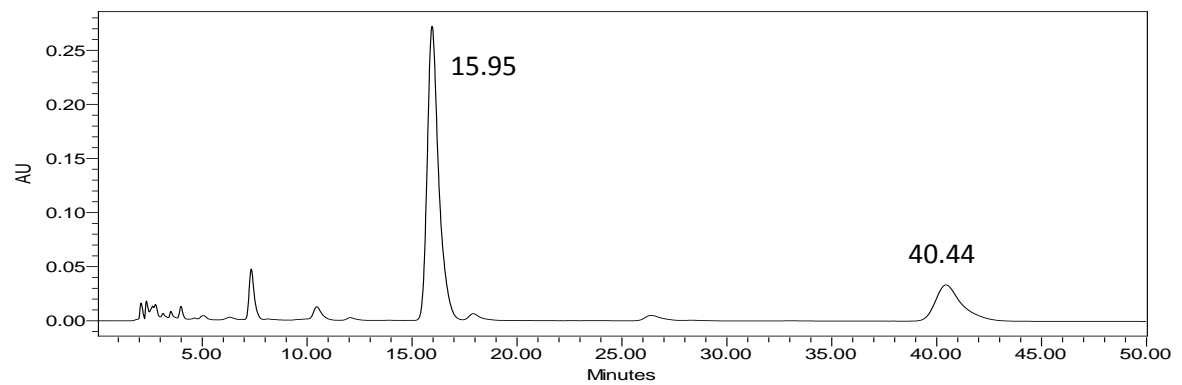

G- *Ramalina fastigiata* acetone extract

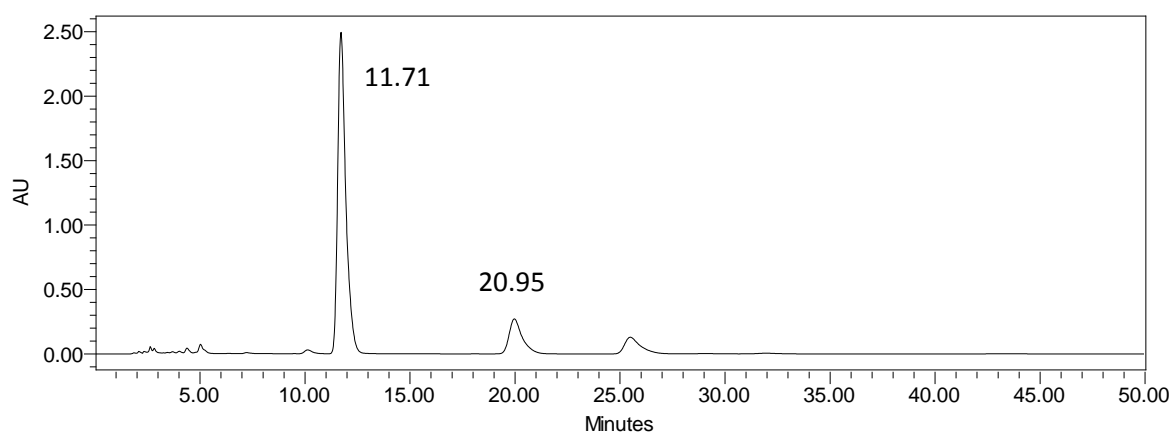

Experimental – Supplementary Information

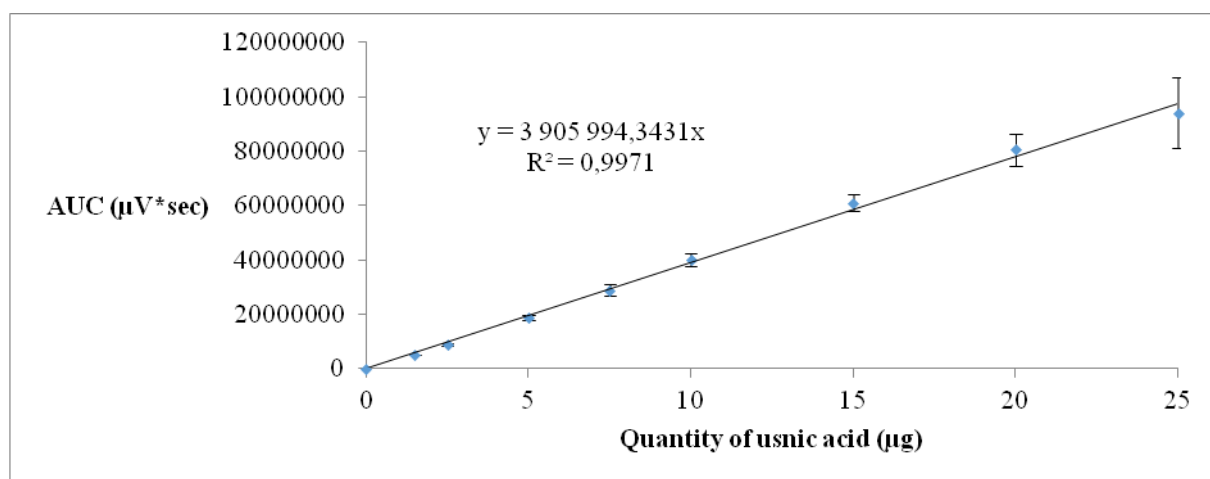

Figure S2: Usnic acid dosage by HPLC.

A calibration curve using usnic acid has been prepared in acetone in order to obtain concentrations ranging between 0.15 and 2.5 mg/mL. Ten microliters of the standard solution have been injected in triplicate.

Extracts have been solubilized in acetone in order to obtain a concentration of 1 mg/mL and 10µL have been injected. The area under the curve (AUC) has been taking to calculate the quantity of usnic acid in the *Usnea florida* and *Flavoparmelia caperata* extracts.

Table S1: Voucher reference number, date and place of collection of lichens.

| <b>Extract number</b> | <b>Lichens</b>                   | <b>Reference Herbarium</b> | <b>Date of collection</b> | <b>Place for collect City (Department)</b> |
|-----------------------|----------------------------------|----------------------------|---------------------------|--------------------------------------------|
| 1                     | <i>Anaptychia ciliaris</i>       | HL-L04/14-01               | 05/04/2014                | Cieux (87)                                 |
| 2                     | <i>Bryoria fuscescens</i>        | HL-L10/09-10               | 06/10/2009                | Peyrol (87)                                |
| 3                     | <i>Cetraria islandica</i>        | HL-L08/12-03               | 15/08/2012                | L'Echo (73)                                |
| 4                     | <i>Cetrelia olivetorum</i>       | HL-L10/09-02               | 06/10/2009                | Gouron-Murat (19)                          |
| 5                     | <i>Cladonia fimbriata</i>        | HL-L04/14-03               | 05/04/2014                | Le Chatenet (87)                           |
| 6                     | <i>Cladonia furcata</i>          | HL-L10/11-29               | 17/10/2011                | Les Roumilloux (19)                        |
| 7                     | <i>Cladonia glauca</i>           | HL-L10/11-08               | 20/10/2011                | St Angel (19)                              |
| 8                     | <i>Cladonia gracilis</i>         | HL-L10/11-06               | 03/10/2011                | Bussi ère-Boffy (87)                       |
| 9                     | <i>Cladonia incrassata</i>       | HL-L09/11-02               | 06/09/2011                | Verneuil/Vienne (87)                       |
| 10                    | <i>Cladonia parasitica</i>       | HL-L09/11-15               | 15/09/2011                | Verneuil/Vienne (87)                       |
| 11                    | <i>Cladonia ramulosa</i>         | HL-L10/11-03               | 03/10/2011                | Bussi ère-Boffy (87)                       |
| 12                    | <i>Cladonia rangiferina</i>      | HL-L10/11-13               | 17/10/2011                | Les Roumilloux (19)                        |
| 13                    | <i>Cladonia scabriuscula</i>     | HL-L10/11-02               | 03/10/2011                | Landes de Frochet (87)                     |
| 14                    | <i>Cladonia squamosa</i>         | HL-L09/11-16               | 15/09/2011                | Verneuil/Vienne (87)                       |
| 15                    | <i>Cladonia subulata</i>         | HL-L03/14-01               | 04/03/2014                | Limoges (87)                               |
| 16                    | <i>Cladonia uncialis</i>         | HL-L10/11-11               | 18/10/2011                | Soudeilles (19)                            |
| 17                    | <i>Evernia prunastri</i>         | HL-L01/14-01               | 05/01/2014                | Verneuil/Vienne (87)                       |
| 18                    | <i>Flavoparmelia caperata</i>    | HL-L10/11-01               | 18/10/2011                | Soudeilles (19)                            |
| 19                    | <i>Hypogymnia physodes</i>       | HL-L10/09-07               | 05/10/2009                | Serandon (19)                              |
| 20                    | <i>Lasallia pustullata</i>       | HL-L10/11-09               | 03/10/2011                | Bussi ère-Boffy (87)                       |
| 21                    | <i>Lepraria membranacea</i>      | HL-L10/11-12               | 17/10/2011                | Les Rouchilloux (19)                       |
| 22                    | <i>Leprocaulon microscopicum</i> | HL-L10/09-05               | 05/10/2009                | S érandon (19)                             |
| 23                    | <i>Neofuscellia pulla</i>        | HL-L04/14-12               | 07/04/2014                | Limoges (87)                               |
| 24                    | <i>Nephroma parile</i>           | HL-L12/09-02a              | 06/12/2009                | Masl ón (87)                               |
| 25                    | <i>Parmelia saxatilis</i>        | HL-L07/10-02               | 12/07/2010                | Crozat (87)                                |
| 26                    | <i>Parmelia sulcata</i>          | HL-L04/14-10               | 07/04/2014                | Limoges (87)                               |
| 27                    | <i>Platismatia glauca</i>        | HL-L10/09-11               | 06/10/2009                | Gourdon-Murat (87)                         |
| 28                    | <i>Pleurosticta acetabulum</i>   | HL-L10/11-26               | 20/11/2011                | Les Ullis (91)                             |
| 29                    | <i>Peltigera collina</i>         | HL L10/14-01               | 03/10/2014                | Soudeilles (19)                            |
| 30                    | <i>Peltigera horizontalis</i>    | HL-L05/14-02               | 10/05/2014                | Largillat (25)                             |
| 31                    | <i>Peltigera hymenina</i>        | HL-L10/11-25               | 20/10/2011                | St Angel (19)                              |
| 32                    | <i>Peltigera rufescens</i>       | HL-L06/12-01               | 24/06/2012                | La Roque Gageac (24)                       |
| 33                    | <i>Peseudevernia furfuracea</i>  | HL-L05/14-01               | 10/05/2014                | Largillat (25)                             |
| 34                    | <i>Ramalina fastigiata</i>       | HL-L04/14-09               | 05/04/2014                | Cieux (87)                                 |
| 35                    | <i>Usnea florida</i>             | HL-L10/11-31               | 19/10/2011                | St Merd les Oussines (19)                  |
| 36                    | <i>Xanthoparmelia conspersa</i>  | HL-L04/14-11               | 07/04/2014                | Limoges (87)                               |
| 37                    | <i>Xanthoparmelia tinctina</i>   | HL-L04/14-13               | 07/04/2014                | Limoges (87)                               |
| 38                    | <i>Xanthoria parietina</i>       | HL-L03/14-04               | 14/03/2014                | Limoges (87)                               |
